# Supplementary material for: Biological Characteristics of Feline Calicivirus Epidemic Strains in China and Screening of Broad-Spectrum Protective Vaccine Strains
Source: MDPI journal article supplement (doi:10.3390/vaccines11121858), 2023-12-15
Supplement: s1 [file s1]

**Table S1.** Neutralizing antibody titers and *in vitro* cross-neutralizing antibody titers of cat sera after immunization with each FCV vaccine strain ((FCV-HB7, FCV-HB10, FCV-HB7&FCV-HB10, FCV-255).

| <b>Group</b> | <b>FCV-HB7</b> | <b>FCV-HB10</b> | <b>FCV-FJ1</b> | <b>FCV-AH3</b> | <b>FCV-JL18</b> | <b>FCV-SH192</b> |
|--------------|----------------|-----------------|----------------|----------------|-----------------|------------------|
| FCV-HB7&HB10 | 10.63          | 10.47           | 9.64           | 8.47           | 9.30            | 7.20             |
| FCV-HB7      | 10.47          | 5.46            | 10.30          | 7.20           | 8.47            | 5.00             |
| FCV-HB10     | 5.64           | 10.30           | 8.20           | 5.29           | 9.47            | 7.00             |
| FCV-255      | 1.00           | 2.00            | 2.00           | 1.00           | 5.00            | 1.00             |

Note: neutralizing antibody titers are expressed as 1:log2 value.
